# Supplementary material for: Occurrence of a single-species cyanobacterial bloom in a lake in Cyprus: monitoring and treatment with hydrogen peroxide-releasing granules
Source: Springer Nature journal article supplement (doi:10.1186/s12302-021-00471-5), 2021-03-12
Supplement: MOESM1 [file 12302_2021_471_MOESM1_ESM.pdf]

## Additional Material

### Occurrence of a single species cyanobacterial bloom in a lake in Cyprus: Monitoring and treatment with hydrogen peroxide releasing granules

Eleni Keliri<sup>1</sup>, Christia Paraskeva<sup>1</sup>, Angelos Sofokleous<sup>1</sup>, Assaf Sukenik<sup>2</sup>, Dariusz Dziga<sup>3</sup>, Ekaterina Chernova<sup>4</sup>, Luc Brient<sup>5</sup>, Maria G. Antoniou<sup>1,\*</sup>

<sup>1</sup>*Department of Chemical Engineering, Cyprus University of Technology, 3036 Lemesos, Cyprus*

<sup>2</sup>*The Yigal Allon Kinneret Limnological Laboratory, Israel Oceanographic and Limnological Research, Migdal, Israel*

<sup>3</sup>*Department of Microbiology, Faculty of Biochemistry, Biophysics and Biotechnology, Jagiellonian University, Gronostajowa 7, 30387 Krakow, Poland*

<sup>4</sup>*St. Petersburg Federal Research Center of the Russian Academy of Sciences (SPC RAS), Scientific Research Centre for Ecological Safety of the Russian Academy of Sciences, 18, Korpusnaya st., Saint Petersburg, 197110, Russia*

<sup>5</sup>*UMR 6553 Centre National de la Recherche Scientifique ECOBIO/OSUR, University of Rennes 1, Rennes, France*

\*Corresponding author: [maria.antoniou@cut.ac.cy](mailto:maria.antoniou@cut.ac.cy)

## Introduction

The most applied stoichiometric reference is the Redfield ratio which describes the nutrient limitation of planktonic production in coastal waters based on the TN:TP (Total Nitrogen: Total Phosphorus) molar ratio [1,2]. Even though Redfield proposed this ratio for its use on oceanic studies, it was well adopted as a universal nutrient limitation threshold with multiple citations in different types of aquatic systems. Redfield referred to an average N:P molar ratio that when exceeds 16, phosphorus becomes the limiting element for phytoplankton growth while when the ratio is below 7, nitrogen is the limiting element. Over the years, different ratios and approaches have been developed for better understanding of the limiting element based on the specific conditions of each waterbody (e.g., nutrient sources, phytoplankton species present). Based on the cited literature, lakes with different characteristics showed different correlations of nutrients with their trophic status, and the efficiency of the Redfield ratio varied in each case [3]. Recent studies indicated that higher TN:TP molar ratios (>22, P-limitation) are more suitable for surface waters while DIN:TP (Dissolved Inorganic Nitrogen: Total Phosphorus) and  $\text{NO}_3^-$ :TP mass ratios have been used more often during the past years for determining the limiting elements in lakes [4]. Studies on dissolved nutrients mass ratios (DIN:TP,  $\text{NO}_3^-$ :TP,  $\text{NH}_4^+$ :TP) suggested that in freshwater systems the DIN:TP mass ratio is a better indicator than the TN:TP molar ratio. Also, the  $\text{NO}_3^-$ :TP mass ratio performed even better than DIN:TP as DIN includes ammonium which in some studies it showed a weak correlation with N-limitation, resulting in a weaker model [5].

**Table S1.** Nutrient limitation approaches and thresholds based on TN:TP, DIN:TP and NO<sub>3</sub><sup>-</sup>:TP ratios in different aquatic environments.

| Ratio                            | Units | Threshold | Nutrient Limitation  | Reference | Aquatic environment studied |
|----------------------------------|-------|-----------|----------------------|-----------|-----------------------------|
| TN:TP                            | Molar | <7        | N – limitation       | [1,2]     | Ocean                       |
|                                  |       | >22       | P – limitation       |           |                             |
| TN:TP                            | Molar | <20       | N – limitation       | [3]       | Lakes; Ocean                |
|                                  |       | 20-50     | N or P limitation    |           |                             |
|                                  |       | >50       | P – limitation       |           |                             |
| DIN:TP                           | Mass  | <9        | N – limitation       | [4]       | Lakes; ponds                |
|                                  |       | 9-22      | N or P co-limitation |           |                             |
|                                  |       | >22       | P – limitation       |           |                             |
| NO <sub>3</sub> <sup>-</sup> :TP | Mass  | <9        | N – limitation       | [4,5]     | Lakes                       |
|                                  |       | 9-22      | N or P co-limitation |           |                             |
|                                  |       | >22       | P – limitation       |           |                             |

The main input of nutrients into the waterbodies comes from agriculture due to the misuse of fertilizers. The European Commission of Environment of the European Union has composed the Water Framework Directive (2000/60/EC) which aims to protect surface waters from chemical pollution [6]. Recently, it was proposed to include a group of cyanotoxins (microcystins) in a revised Drinking Water Directive on the Quality of Water Intended for Human Consumption [7]. If this comes through, it will enforce public authorities to include cyanobacteria and cyanotoxins into their monitoring and mitigation strategies in order to comply with the new directives and legislations of EU.

Additionally, the Organization for Economic Co-operation and Development (OECD) has actively participated in the development of frameworks and guidelines by reforming the surface water quality regulations in Eastern European and Central Asian countries [8-10]. Based on those, OECD proposed a surface water classification (I – V class; excellent – bad) system based on different water quality characteristics. Its use has been widely adopted for monitoring water quality and apply restorative measures when needed. In the present study, water class was evaluated based on the limits set by OECD for acidification status and total and dissolved nutrient concentration as shown in Table 2.

**Table S2.** Proposed surface water quality standards by OECD based on the EU Directive (2000/60/EC).

| Parameter        | Unit      | Class I   | Class II | Class III | Class IV | Class V |
|------------------|-----------|-----------|----------|-----------|----------|---------|
| pH               | [-]       | 6.5 – 9.0 |          |           |          |         |
| Total Nitrogen   | [mg NL-1] | 1.5       | 4        | 8         | 20       | >20     |
| Nitrate          | [mg NL-1] | 1         | 3        | 5.6       | 11.3     | >11.3   |
| Nitrite          | [mg NL-1] | 0.01      | 0.06     | 0.12      | 0.3      | >0.3    |
| Ammonium         | [mg NL-1] | 0.2       | 0.4      | 0.8       | 3.1      | >3.1    |
| Total Phosphorus | [mg NL-1] | 0.1       | 0.2      | 0.4       | 1        | >1      |
| Orthophosphates  | [mg NL-1] | 0.05      | 0.1      | 0.2       | 0.5      | >0.5    |

### Sampling site and dates of sampling

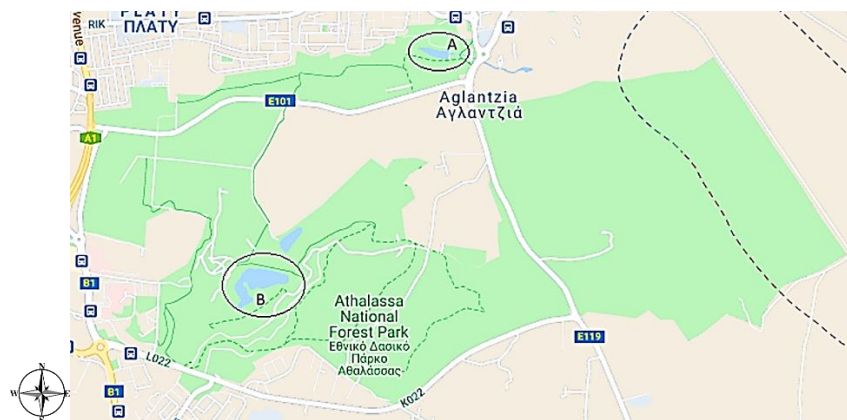

**Scheme S1.** Lakes in the National Forest Park of Athalassa: (A) St. George Lake and (B) Athalassa Lake located at the Athalassa National Forest Park.

**Table S3.** Sample number and date of sampling event in St. George Lake.

| Sample n° | Date       |
|-----------|------------|
| 1         | 25/02/2019 |
| 2         | 04/03/2019 |
| 3         | 18/04/2019 |
| 4         | 12/07/2019 |
| 5         | 06/08/2019 |
| 6         | 22/08/2019 |
| 7         | 09/09/2019 |
| 8         | 15/10/2019 |
| 9         | 12/11/2019 |
| 10        | 09/12/2019 |

## Results

### Monitoring

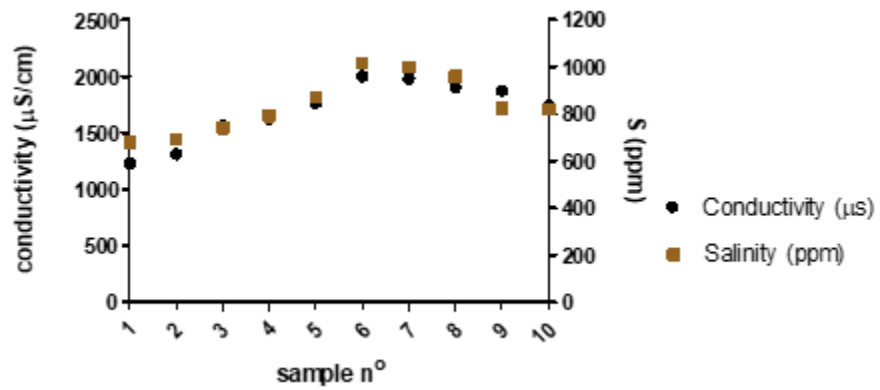

**Figure S1.** Conductivity (left axis) and salinity (right axis) measured with EXTECH portable probe in St. George Lake surface samples.

## Cyanotoxins analysis

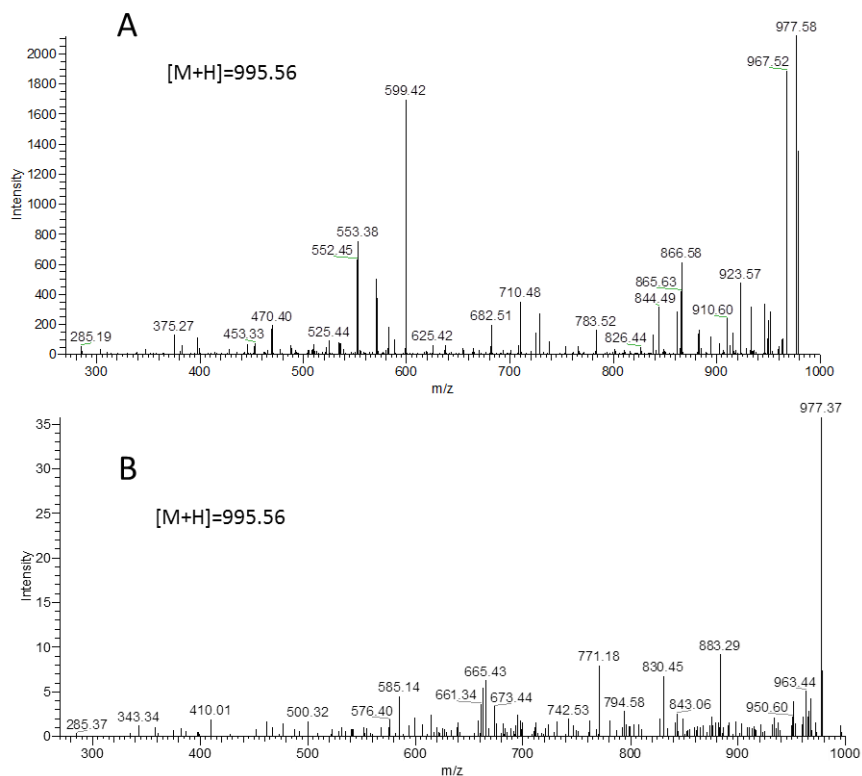

**Figure S2.** MS/MS spectra of the (A) MC-LR standard compound and (B) compound detected in samples with [M+H] =995.56 but different fragmentation pattern.

## References

1. Redfield AC (1934) On the proportions of organic derivatives in sea water and their relation to the composition of the plankton. In: James Johnstone memorial Volume, University of Liverpool.
2. Redfield AC (1958) The biological control of chemical factors in the environment. *Am Sci.* 46:205–221.
3. Ptacnik R, Andersen T, Tamminen T (2010) Performance of the Redfield Ratio and a Family of Nutrient Limitation Indicators as Thresholds for Phytoplankton N vs. P Limitation. *Ecosystems* 13:1201-1214

4. Guildford SJ, Hecky RE (2000) Total nitrogen, total phosphorus, and nutrient limitation in lakes and oceans: Is there a common relationship? *Limnol. Oceanogr.* 45(6):1213-1223.
5. Bergström A (2010) The use of TN:TP and DIN:TP ratios as indicators for phytoplankton nutrient limitation in oligotrophic lakes affected by N deposition. *Aquat Sci.* 72:277–281.
6. Symons CC, Arnott SE, Sweetman JN (2012) Nutrient limitation of phytoplankton communities in Subarctic lakes and ponds in Wapusk National Park, Canada. *Polar Biol.* 35: 481–489.
7. Levine M, Whalen S (2001) Nutrient limitation of phytoplankton production in Alaskan Arctic foothill lakes. *Hydrobiologia* 455:189–201.
8. EC (2000) Directive 2000/60/EC of the European Parliament and of the Council establishing a framework for Community action in the field of water policy. *OJ L* 327:1-72.
9. EC (2018) Proposal for a directive - COM (2017)753, RECAST2017 Revision of the Drinking Water Directive. <https://ec.europa.eu/info/L-1aw/better-regulation/have-your-say/initiatives/1563-Revision-of-the-Drinking-Water-Directive-RECAST-2017->.
10. Caspers H (1984) Eutrophication of Waters. Monitoring, Assessment and Control by: Organisation for Economic Co-Operation and Development (OECD). *Int Rev Hydrobiol.* 69 (2).
